# Supplementary material for: Optimization of 2-Aminoquinazolin-4-(3H)-one Derivatives as Potent Inhibitors of SARS-CoV-2: Improved Synthesis and Pharmacokinetic Properties
Source: MDPI journal article supplement (doi:10.3390/ph15070831), 2022-07-04
Supplement: s1 [file s1]

## Supporting Information

### Optimization of 2-aminoquinazolin-4(3*H*)-one derivatives as potent inhibitors of SARS-CoV-2: efficient synthesis and improved pharmacokinetic properties

Young Sup Shin<sup>1,2,†</sup>, Jun Young Lee<sup>1,2,†</sup>, Sangeun Jeon<sup>3</sup>, Jung-Eun Cho<sup>2</sup>, Subeen Myung<sup>2,4</sup>, Min Seong Jang<sup>5</sup>, Seungtaek Kim<sup>3</sup>, Jong Hwan Song<sup>2</sup>, Hyoung Rae Kim<sup>2</sup>, Hyeung-geun Park<sup>1,\*</sup>, Lak Shin Jeong<sup>1,\*</sup>, Chul Min Park<sup>2,4,\*</sup>

<sup>1</sup>*Research Institute of Pharmaceutical Sciences, College of Pharmacy, Seoul National University, Seoul 08826, Korea*

<sup>2</sup>*Center for Convergent Research of Emerging Virus Infection (CEVI), Korea Research Institute of Chemical Technology, 141 Gajeong-ro, Yuseong-gu, Daejeon 34114, Korea*

<sup>3</sup>*Zoonotic Virus Laboratory, Institut Pasteur Korea, Seongnam-si, Gyeonggi-do 13488, Korea*

<sup>4</sup>*Medicinal Chemistry and Pharmacology, Korea University of Science and Technology, Daejeon 34114, Korea*

<sup>5</sup>*Department of Non-Clinical Studies, Korea Institute of Toxicology, Yuseong-gu, Daejeon 34114, Korea*

\*Correspondence: parkcm@kriect.re.kr (C.M. Park), lakjeong@snu.ac.kr (L.S. Jeong), hgpk@snu.ac.kr (H.-g. Park)

†These authors contributed equally to this work

†

#### Table of contents:

|                                                                 |    |
|-----------------------------------------------------------------|----|
| <sup>1</sup> H& <sup>13</sup> C NMR Spectra for <b>1a</b> ..... | S3 |
| <sup>1</sup> H& <sup>13</sup> C NMR Spectra for <b>1b</b> ..... | S4 |
| <sup>1</sup> H& <sup>13</sup> C NMR Spectra for <b>1c</b> ..... | S5 |
| <sup>1</sup> H& <sup>13</sup> C NMR Spectra for <b>4a</b> ..... | S6 |

|                                                                                                                           |     |
|---------------------------------------------------------------------------------------------------------------------------|-----|
| $^1\text{H}$ & $^{13}\text{C}$ NMR Spectra for <b>4b</b> .....                                                            | S7  |
| $^1\text{H}$ & $^{13}\text{C}$ NMR Spectra for <b>5c</b> .....                                                            | S8  |
| $^1\text{H}$ & $^{13}\text{C}$ NMR Spectra for <b>2a</b> .....                                                            | S9  |
| $^1\text{H}$ & $^{13}\text{C}$ NMR Spectra for <b>2b</b> .....                                                            | S10 |
| $^1\text{H}$ & $^{13}\text{C}$ NMR Spectra for <b>2c</b> .....                                                            | S11 |
| $^1\text{H}$ & $^{13}\text{C}$ NMR Spectra for <b>6a</b> .....                                                            | S12 |
| $^1\text{H}$ & $^{13}\text{C}$ NMR Spectra for <b>6b</b> .....                                                            | S13 |
| $^1\text{H}$ & $^{13}\text{C}$ NMR Spectra for <b>6c</b> .....                                                            | S14 |
| $^1\text{H}$ & $^{13}\text{C}$ NMR Spectra for <b>6d</b> .....                                                            | S15 |
| $^1\text{H}$ & $^{13}\text{C}$ NMR Spectra for <b>7</b> .....                                                             | S16 |
| $^1\text{H}$ & $^{13}\text{C}$ NMR Spectra for <b>8</b> .....                                                             | S17 |
| <b>Figure 1S.</b> Concentration-response inhibition curves of <b>2a</b> and <b>2b</b> against SARS-CoV-2 pseudovirus..... | S18 |

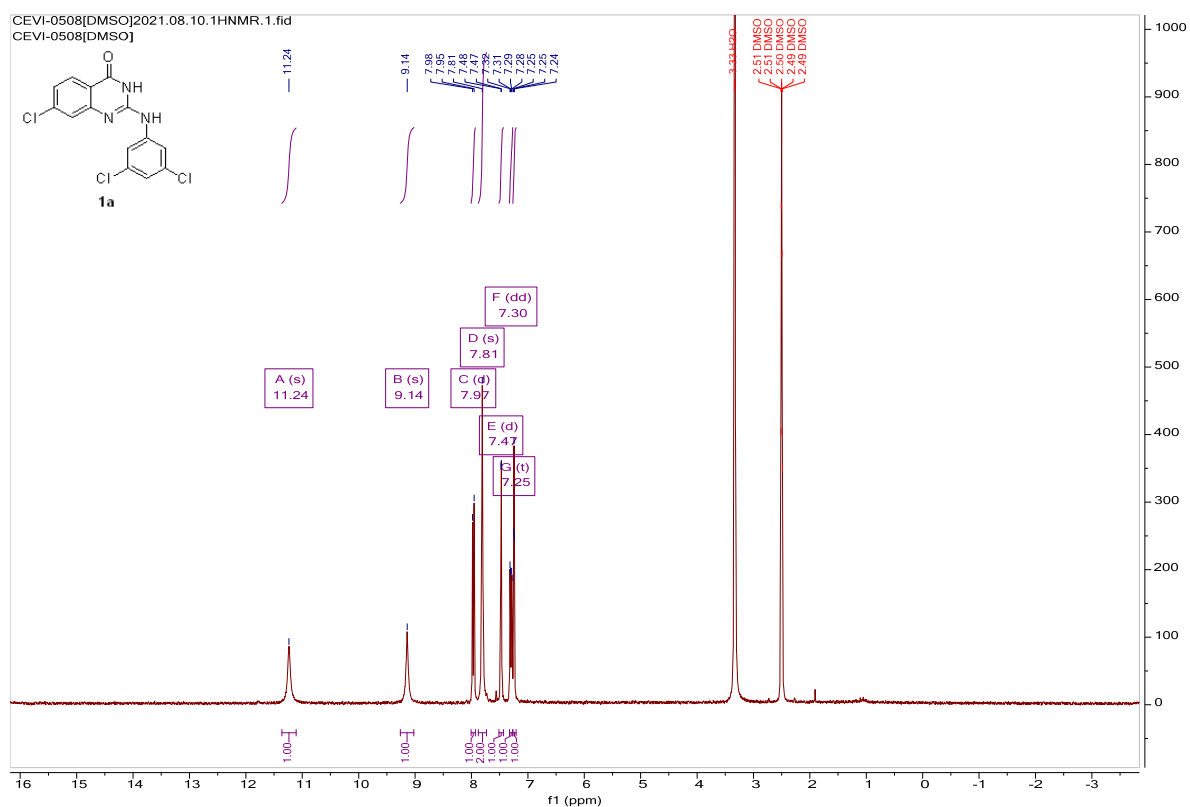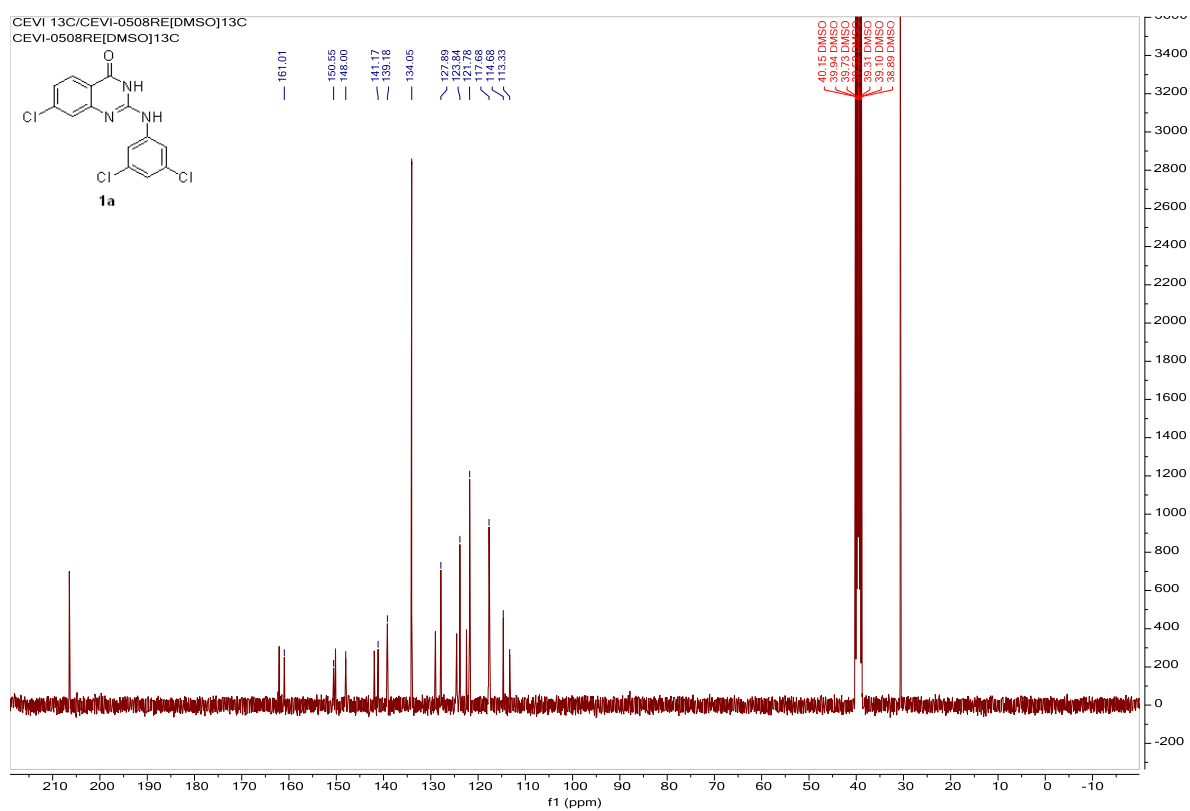

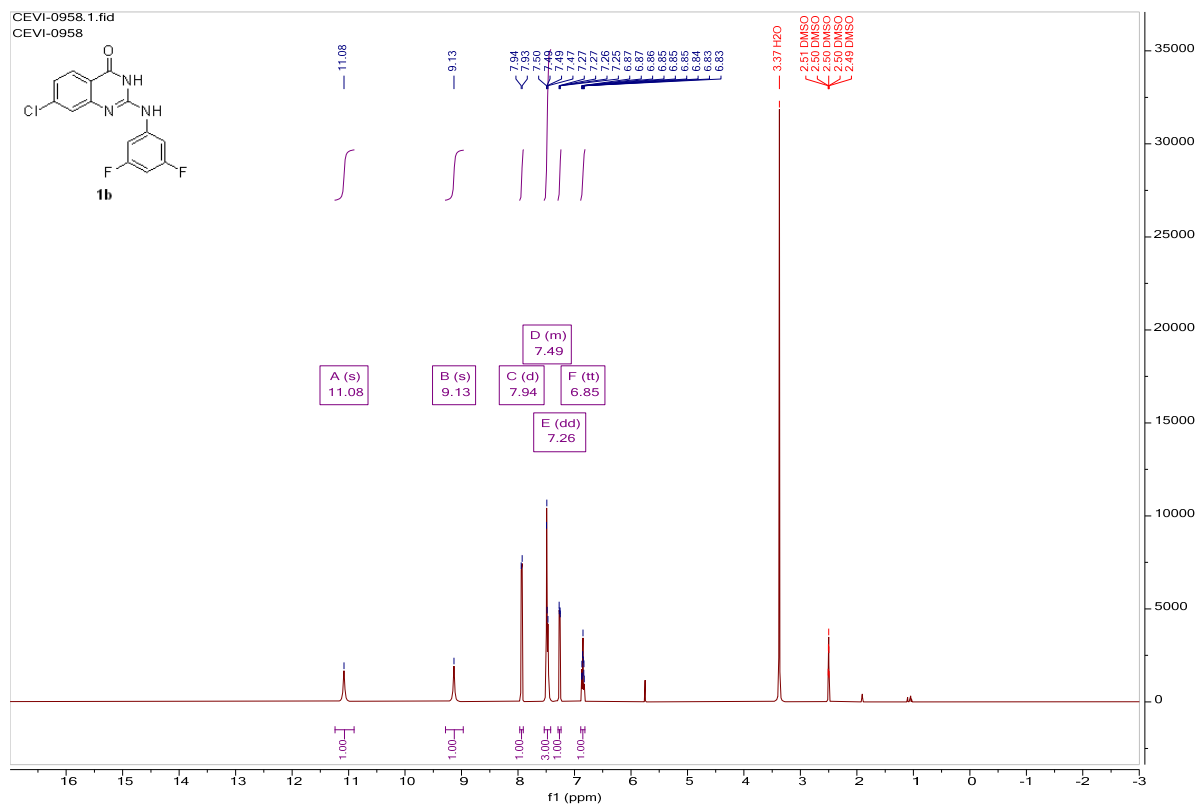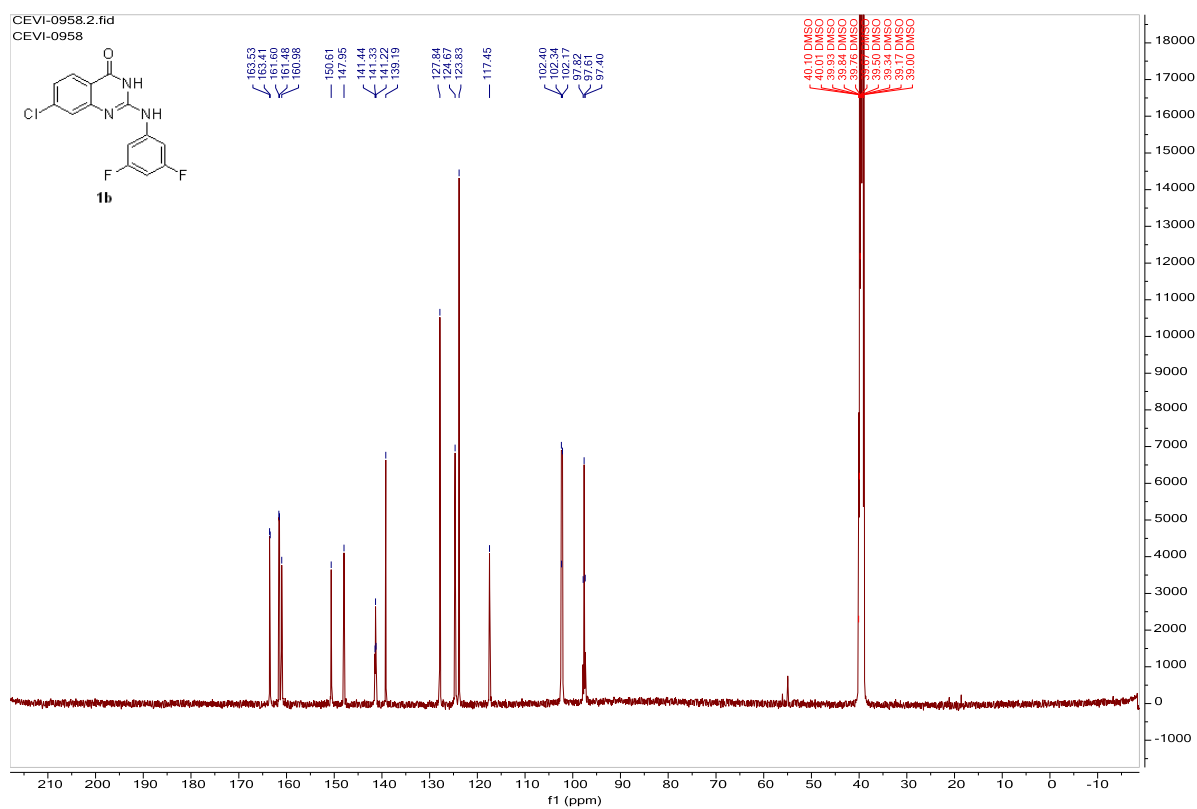

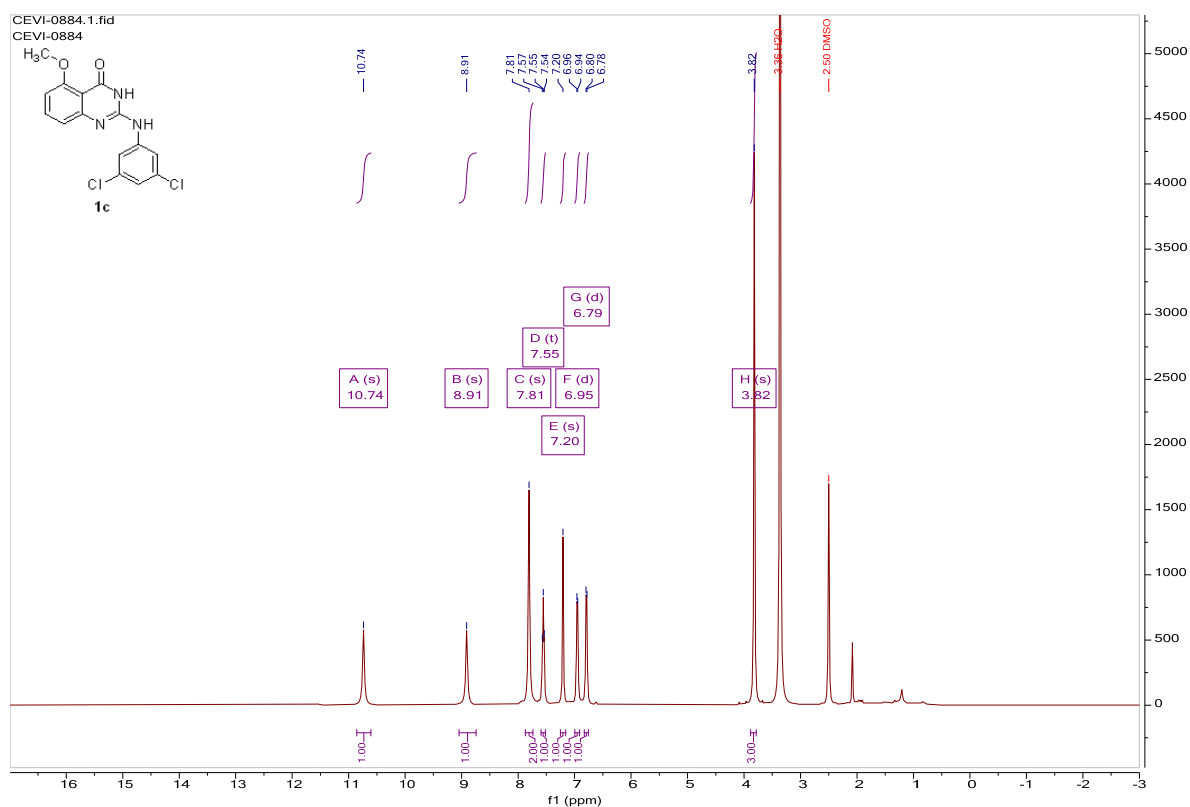

<sup>1</sup>H NMR spectrum (500 MHz, DMSO-*d*<sub>6</sub>) of **1c**

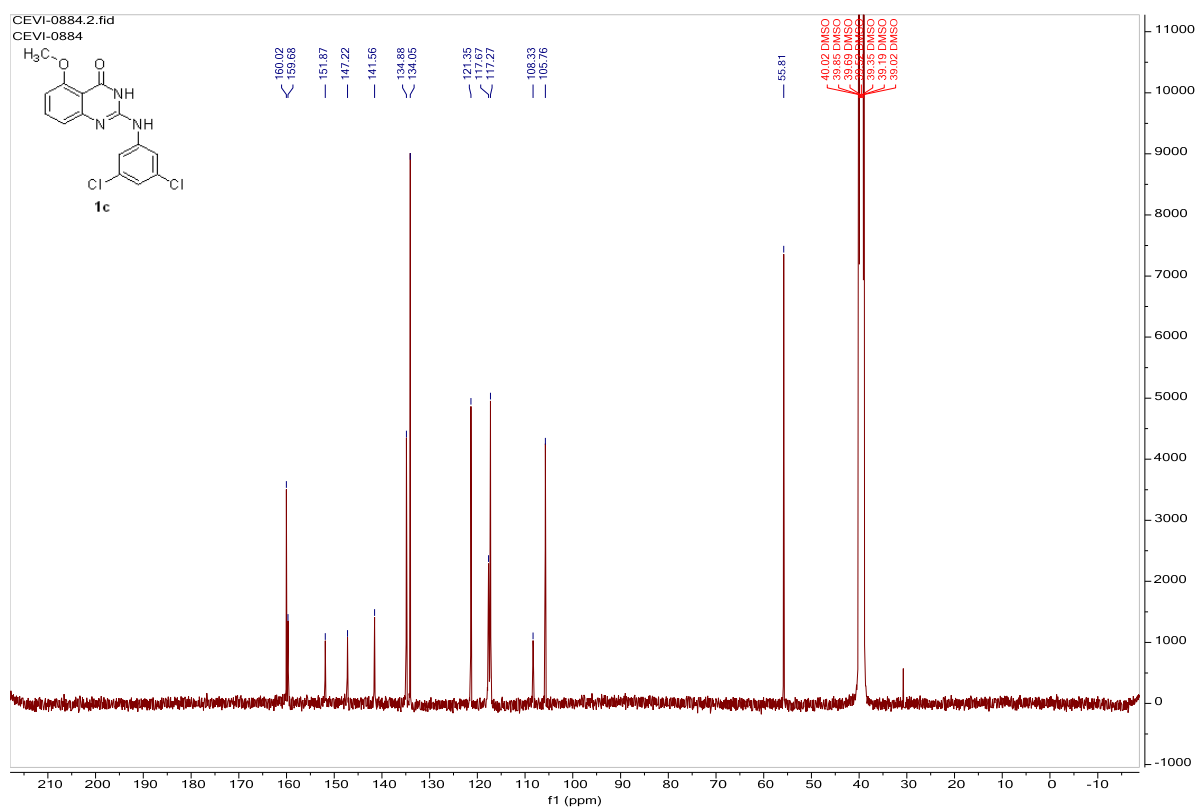

<sup>13</sup>C NMR spectrum (125 MHz, DMSO-*d*<sub>6</sub>) of **1c**

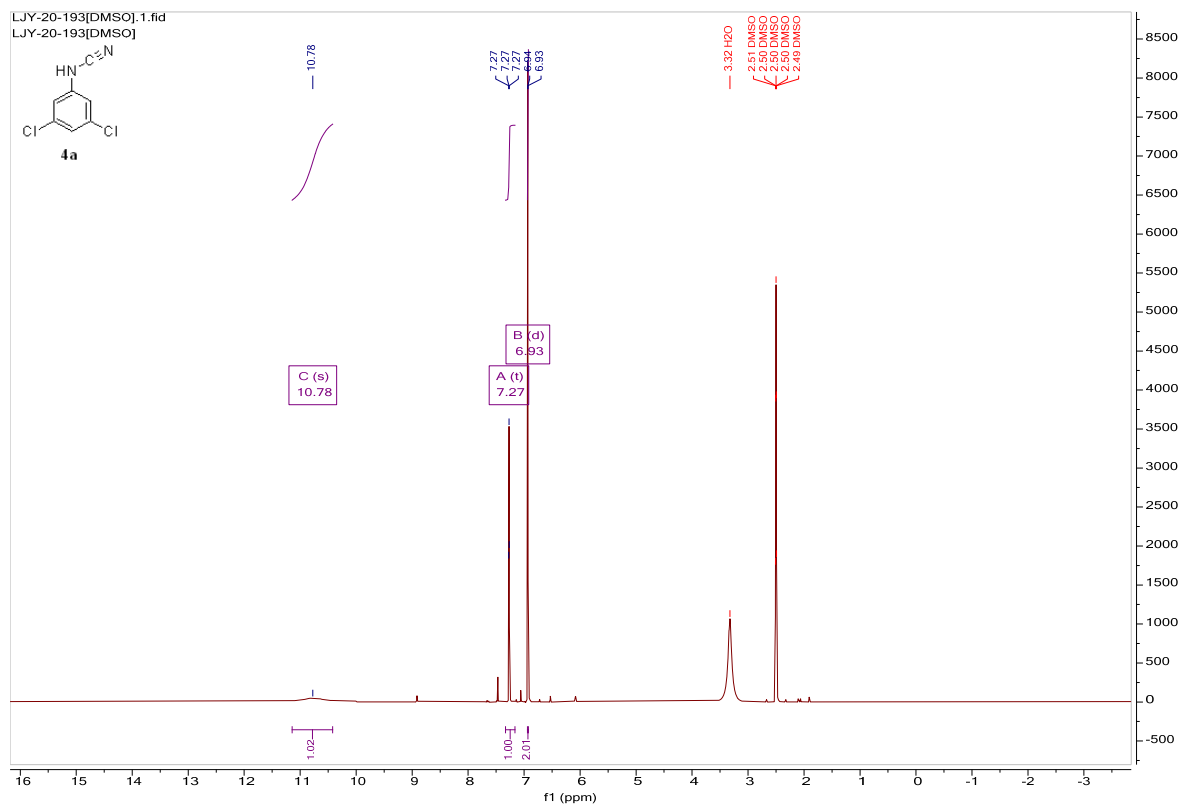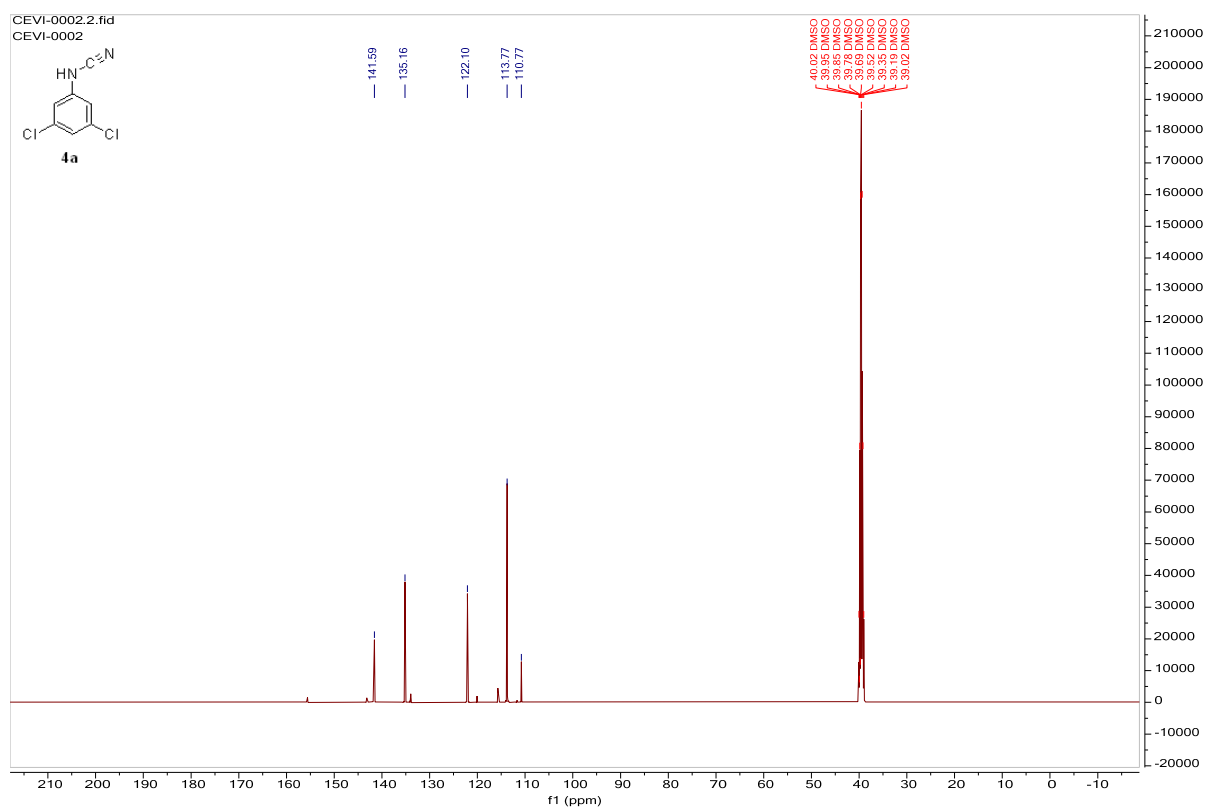

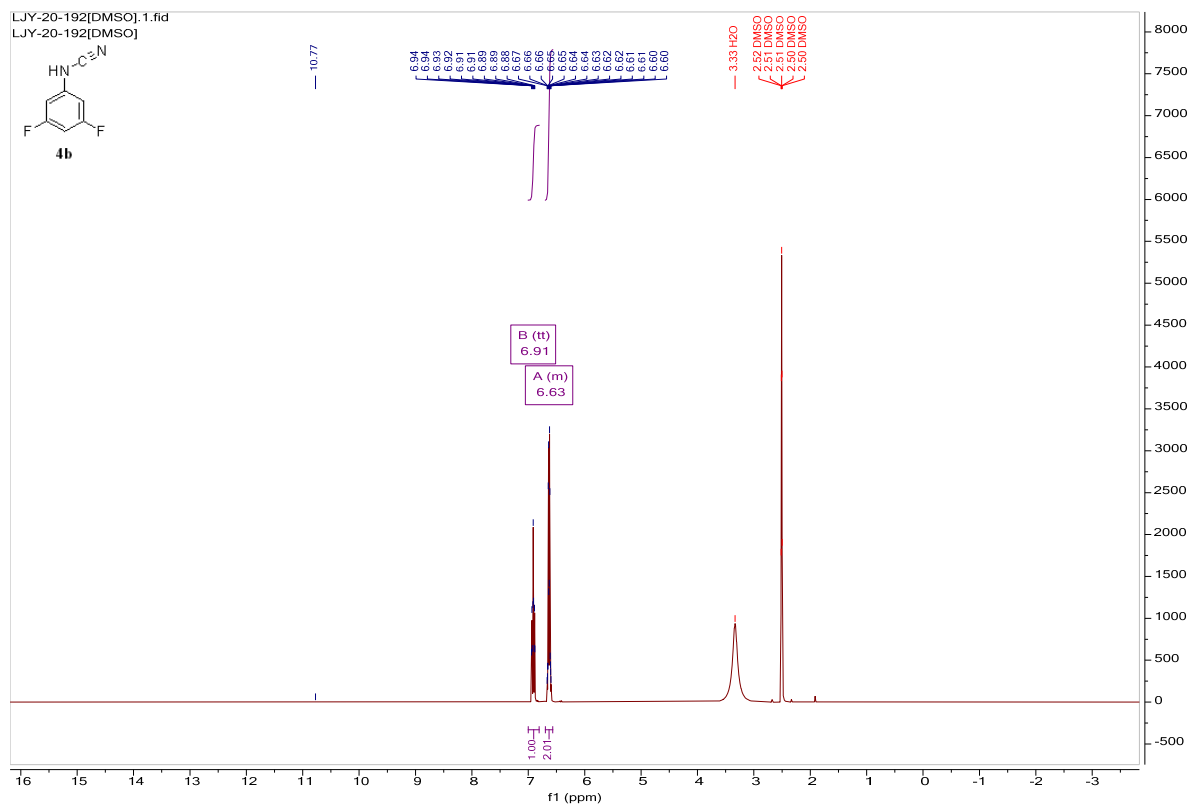

<sup>1</sup>H NMR spectrum (400 MHz, DMSO-*d*<sub>6</sub>) of **4b**

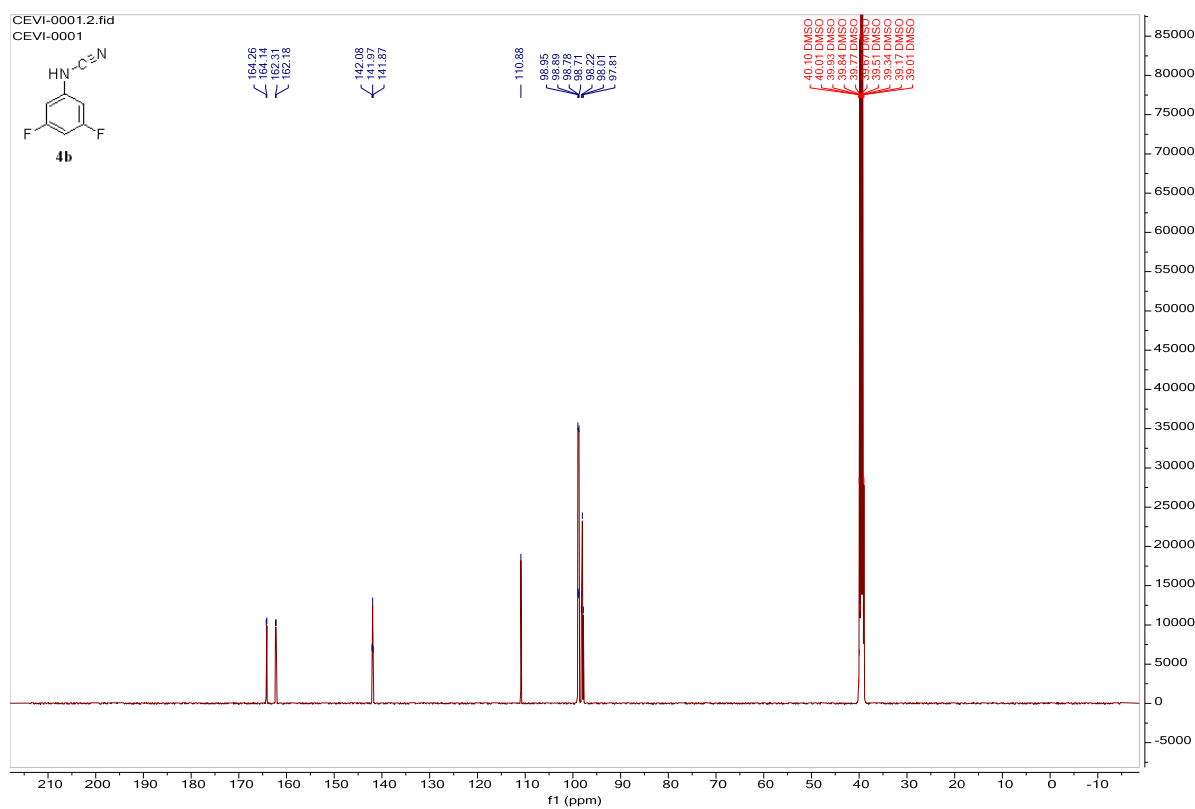

<sup>13</sup>C NMR spectrum (100 MHz, DMSO-*d*<sub>6</sub>) of **4b**

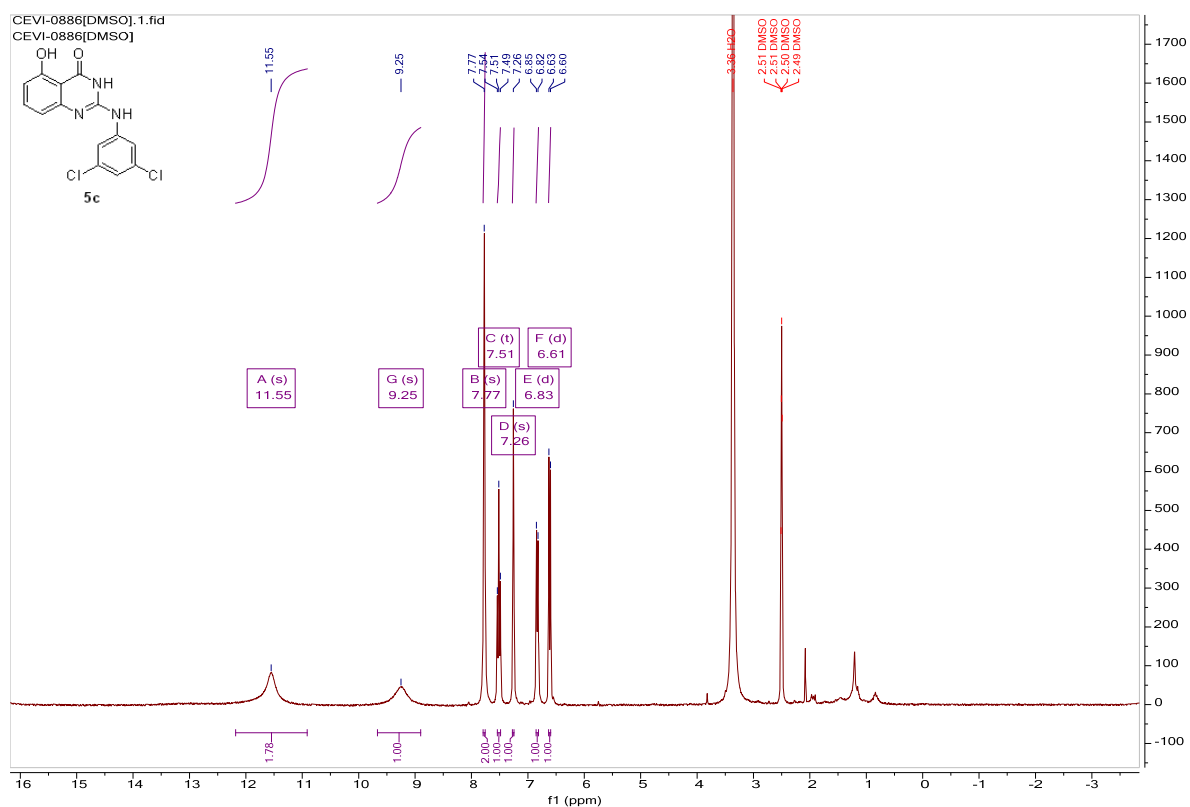

$^1\text{H}$  NMR spectrum (300 MHz,  $\text{DMSO}-d_6$ ) of **5c**

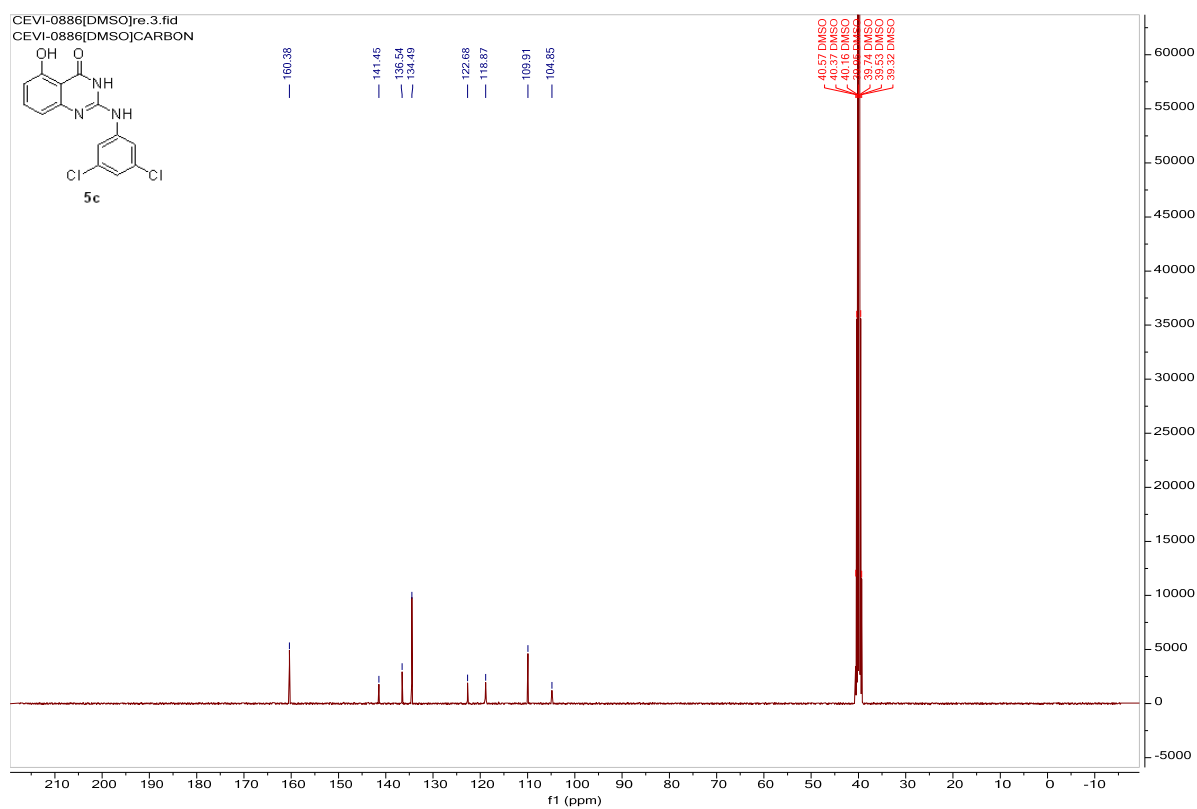

$^{13}\text{C}$  NMR spectrum (125 MHz,  $\text{DMSO}-d_6$ ) of **5c**



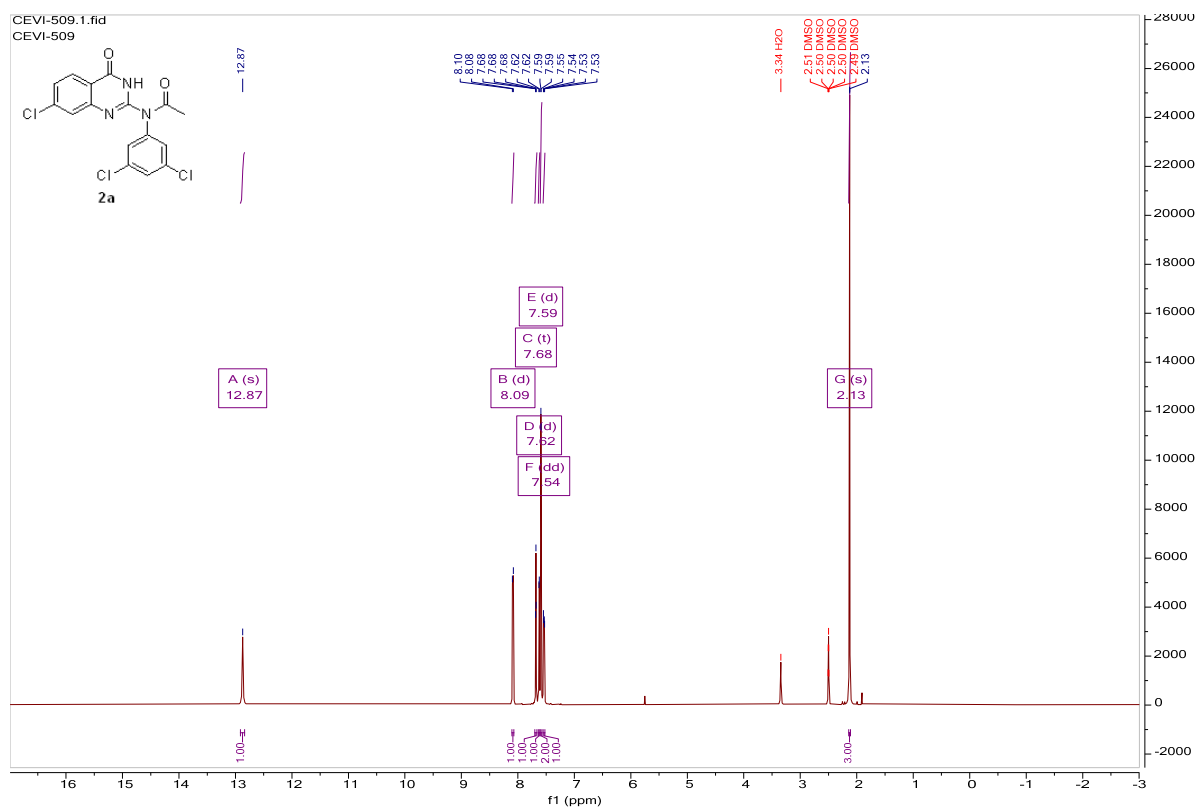

$^1\text{H}$  NMR spectrum (500 MHz,  $\text{DMSO}-d_6$ ) of **2a**

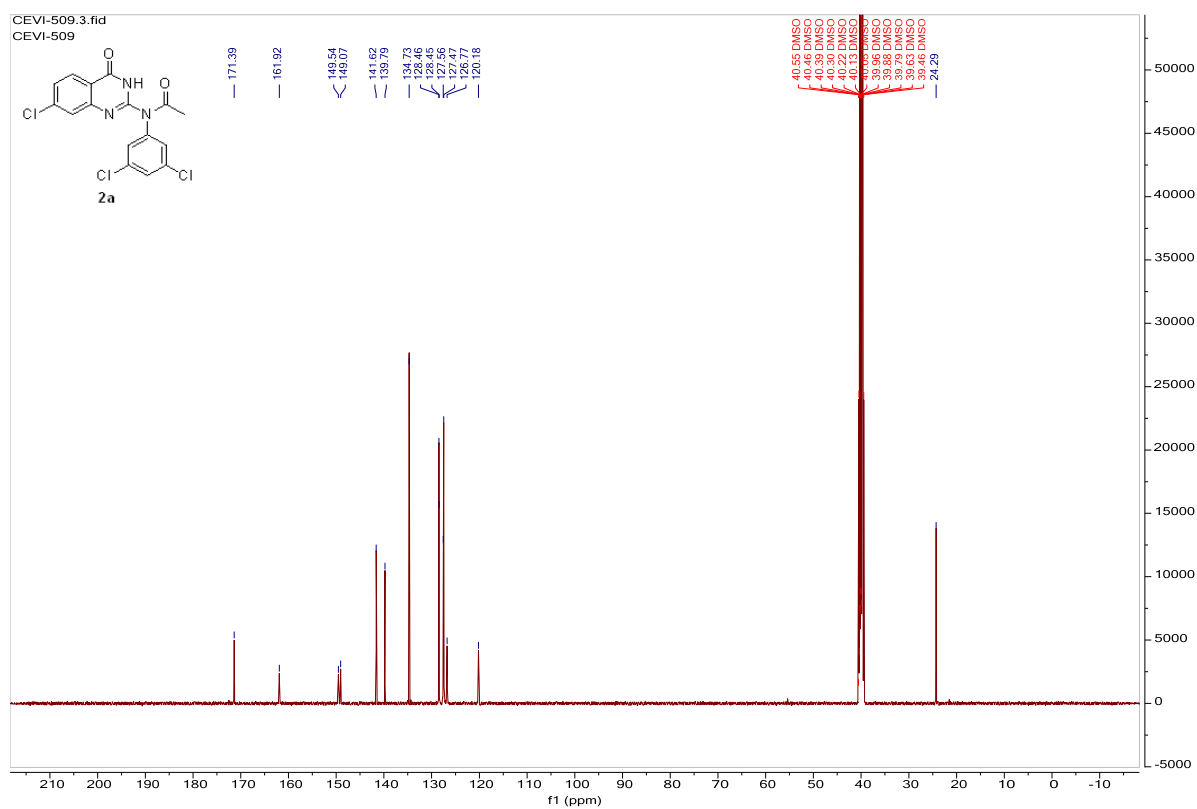

$^{13}\text{C}$  NMR spectrum (125 MHz,  $\text{DMSO}-d_6$ ) of **2a**

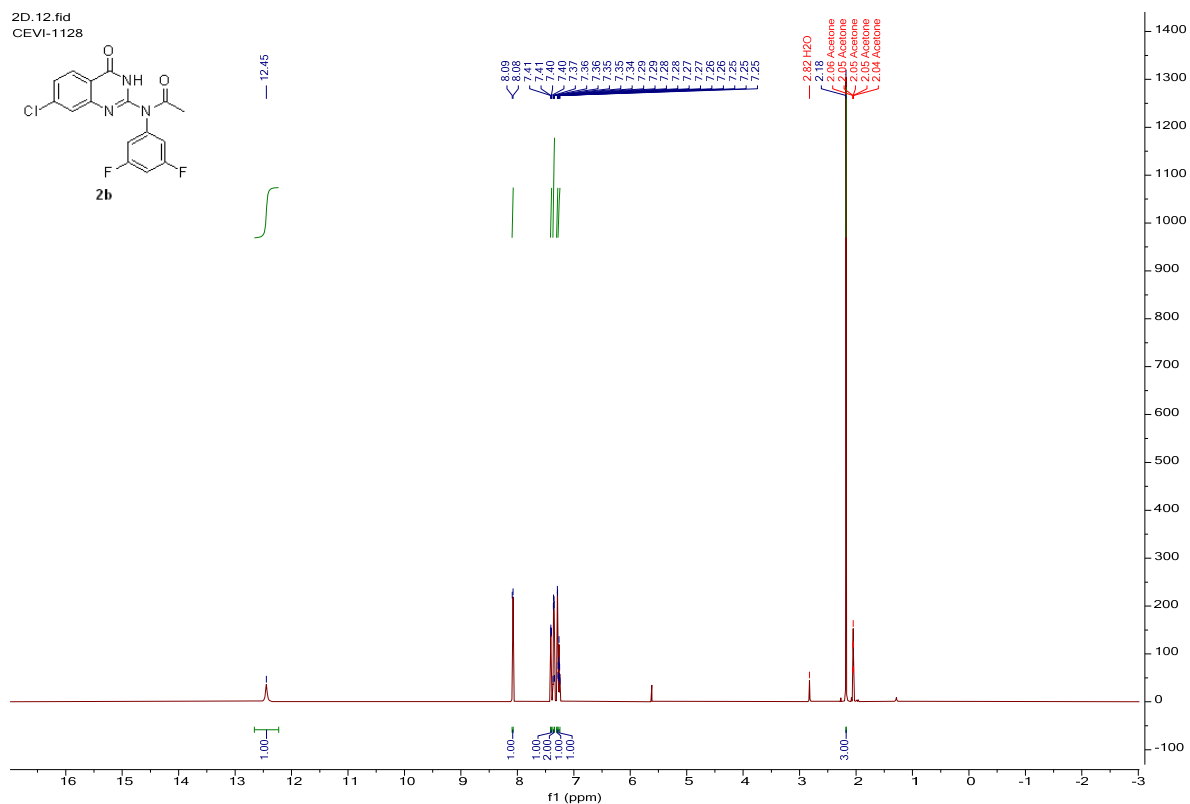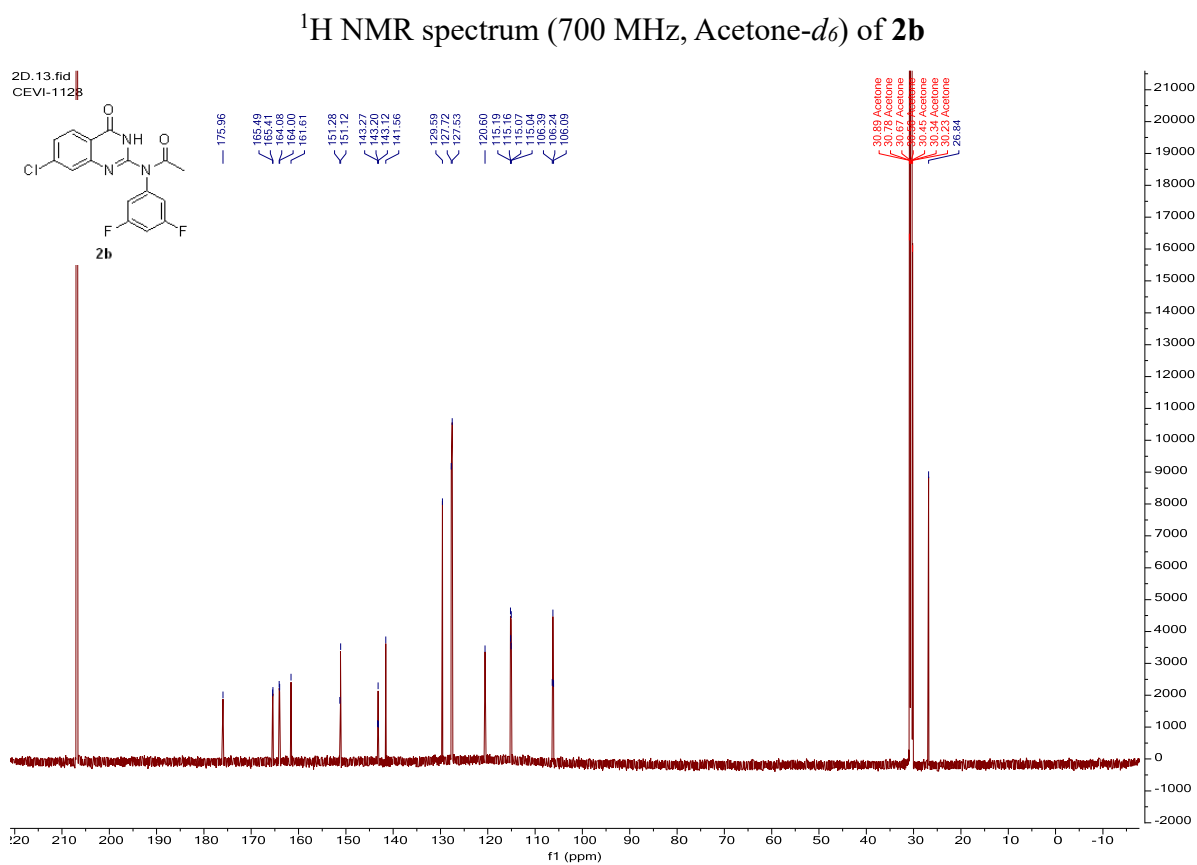

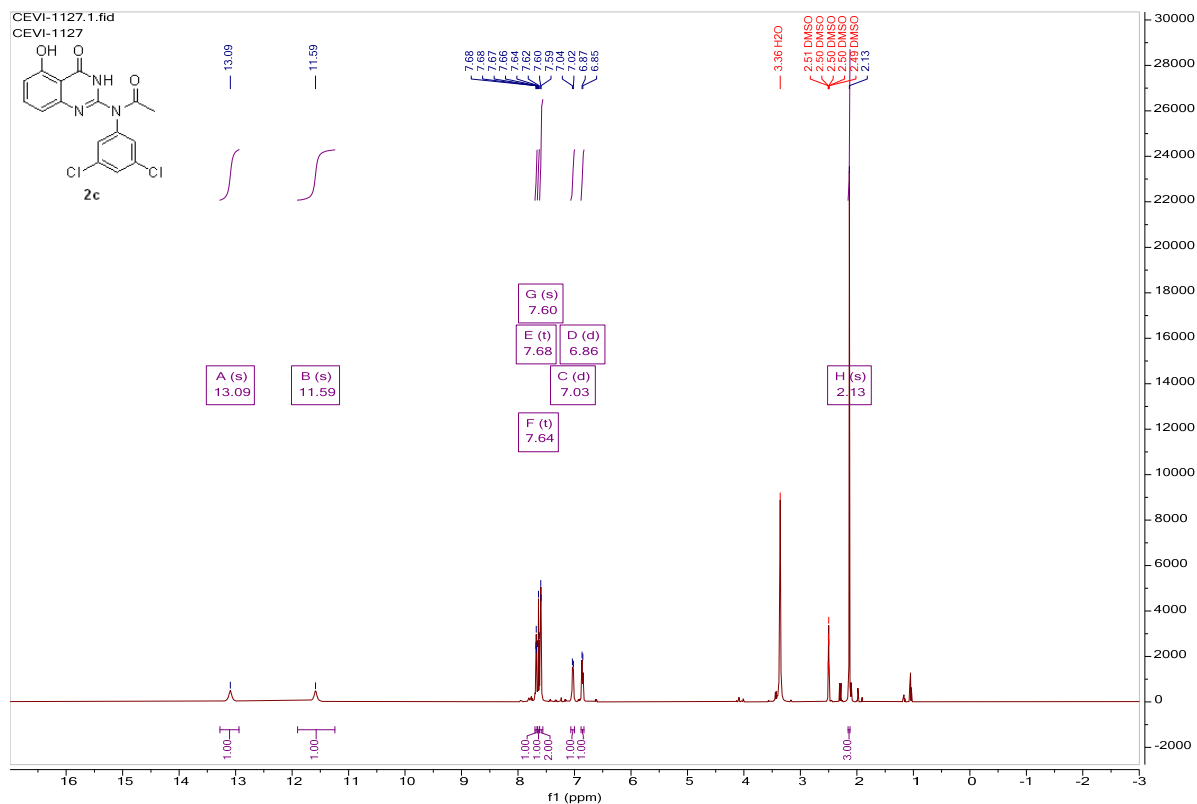

<sup>1</sup>H NMR spectrum (500 MHz, DMSO-*d*<sub>6</sub>) of **2c**

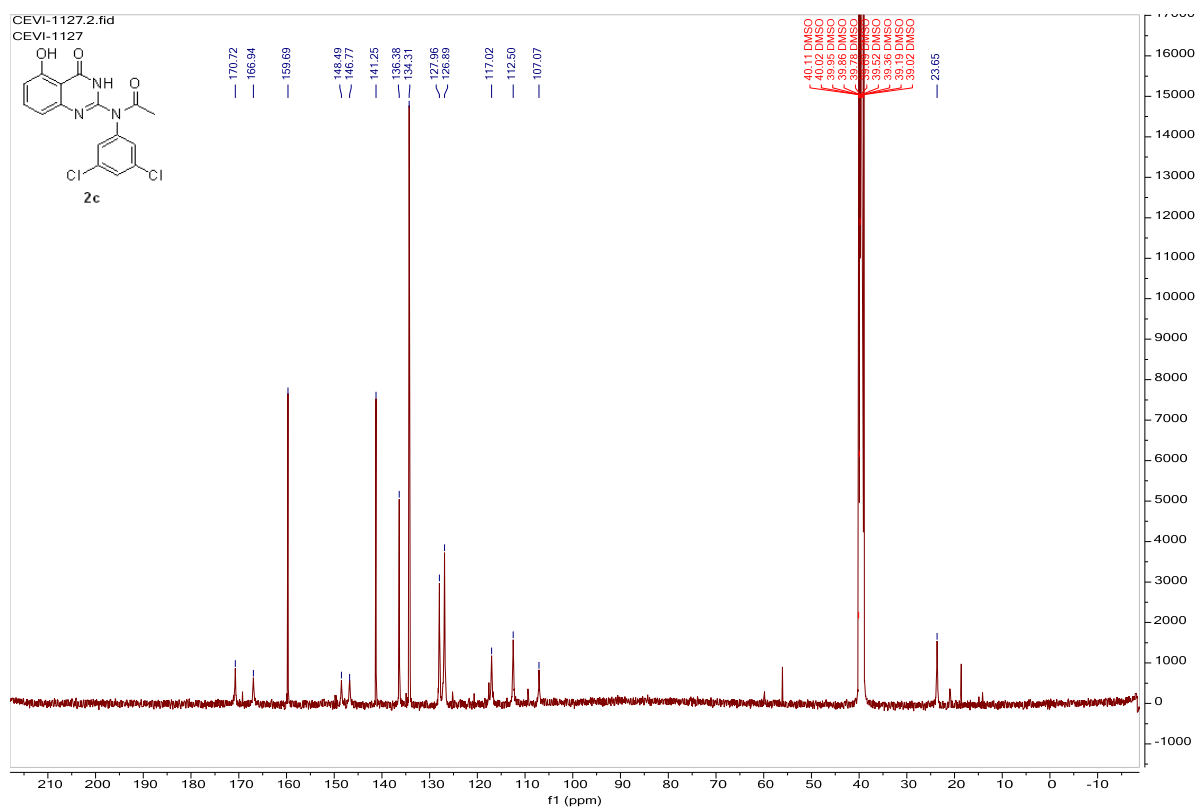

<sup>13</sup>C NMR spectrum (125 MHz, DMSO-*d*<sub>6</sub>) of **2c**

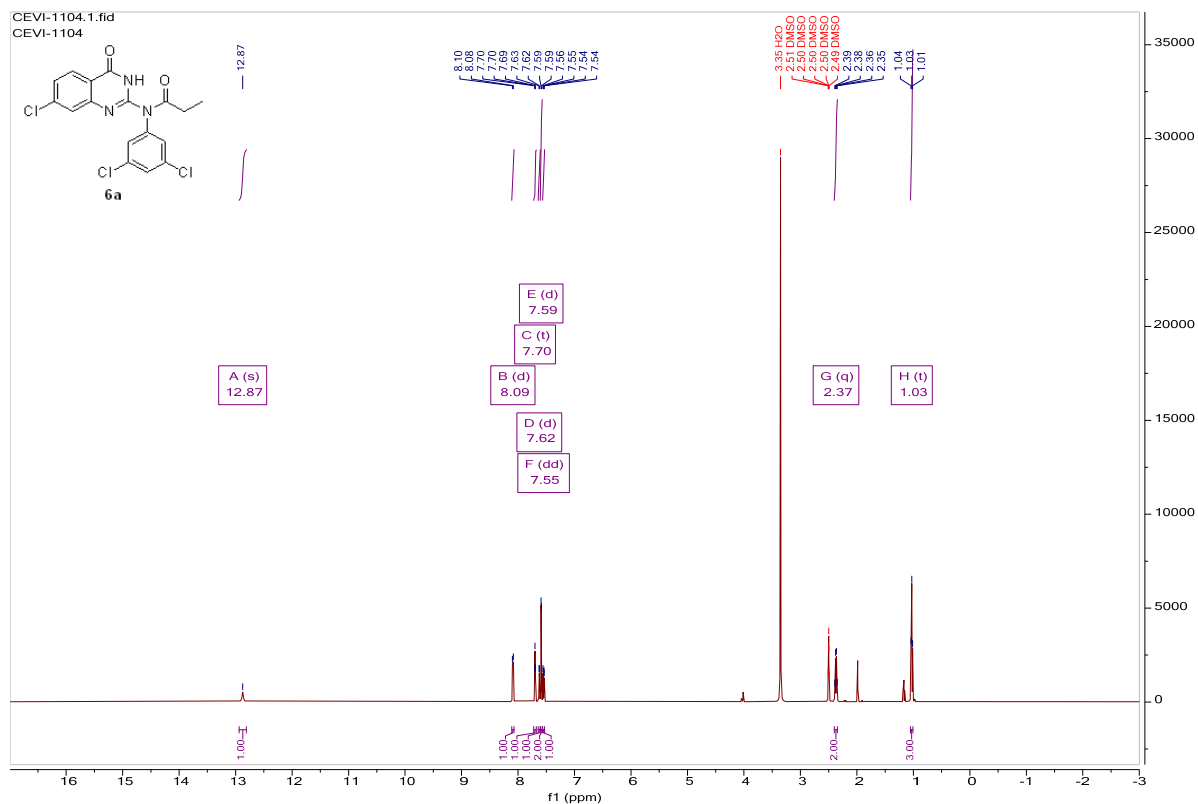

<sup>1</sup>H NMR spectrum (500 MHz, DMSO-*d*<sub>6</sub>) of **6a**

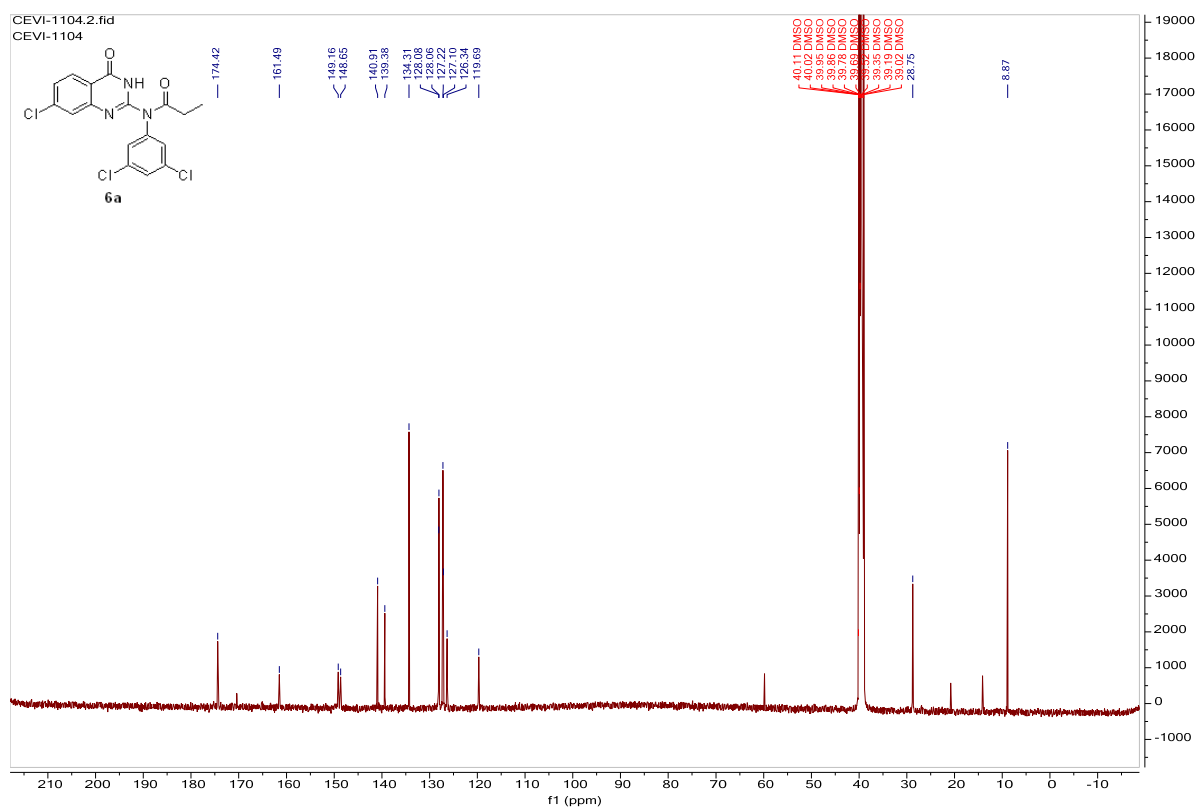

<sup>13</sup>C NMR spectrum (125 MHz, DMSO-*d*<sub>6</sub>) of **6a**

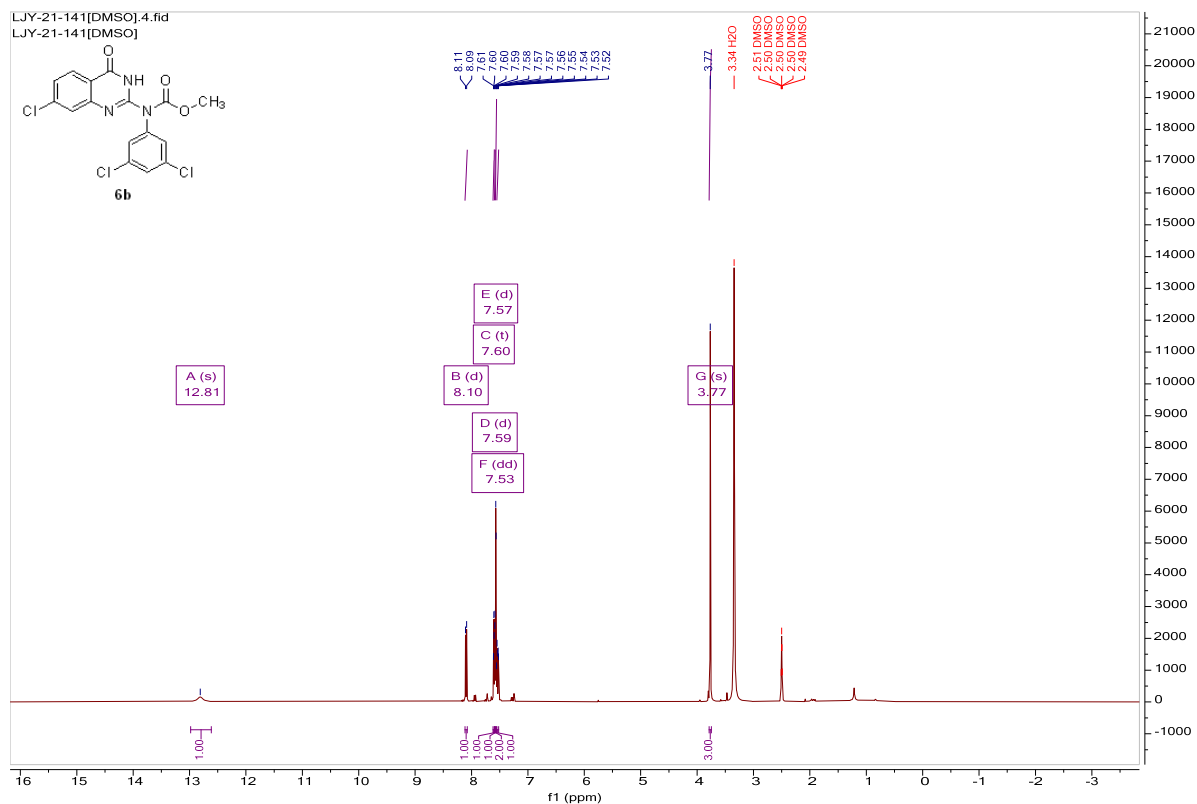

<sup>1</sup>H NMR spectrum (400 MHz, DMSO-*d*<sub>6</sub>) of **6b**

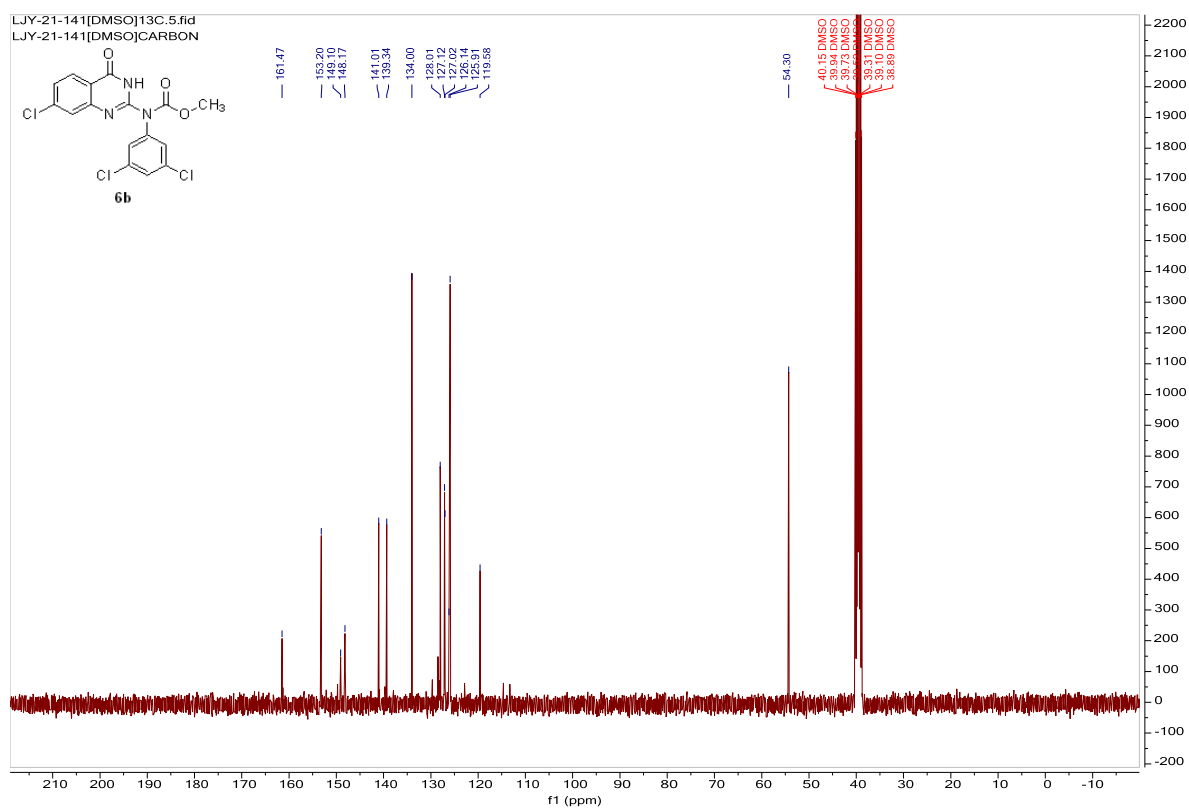

<sup>13</sup>C NMR spectrum (100 MHz, DMSO-*d*<sub>6</sub>) of **6b**

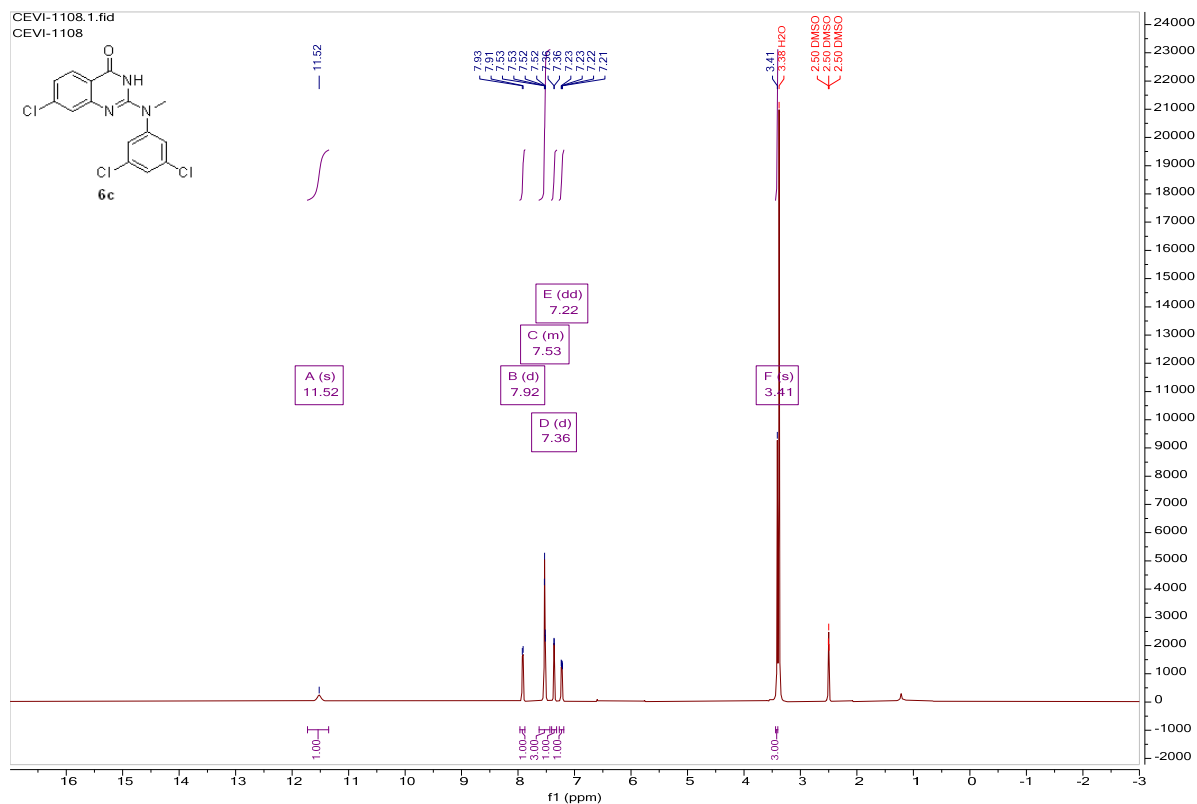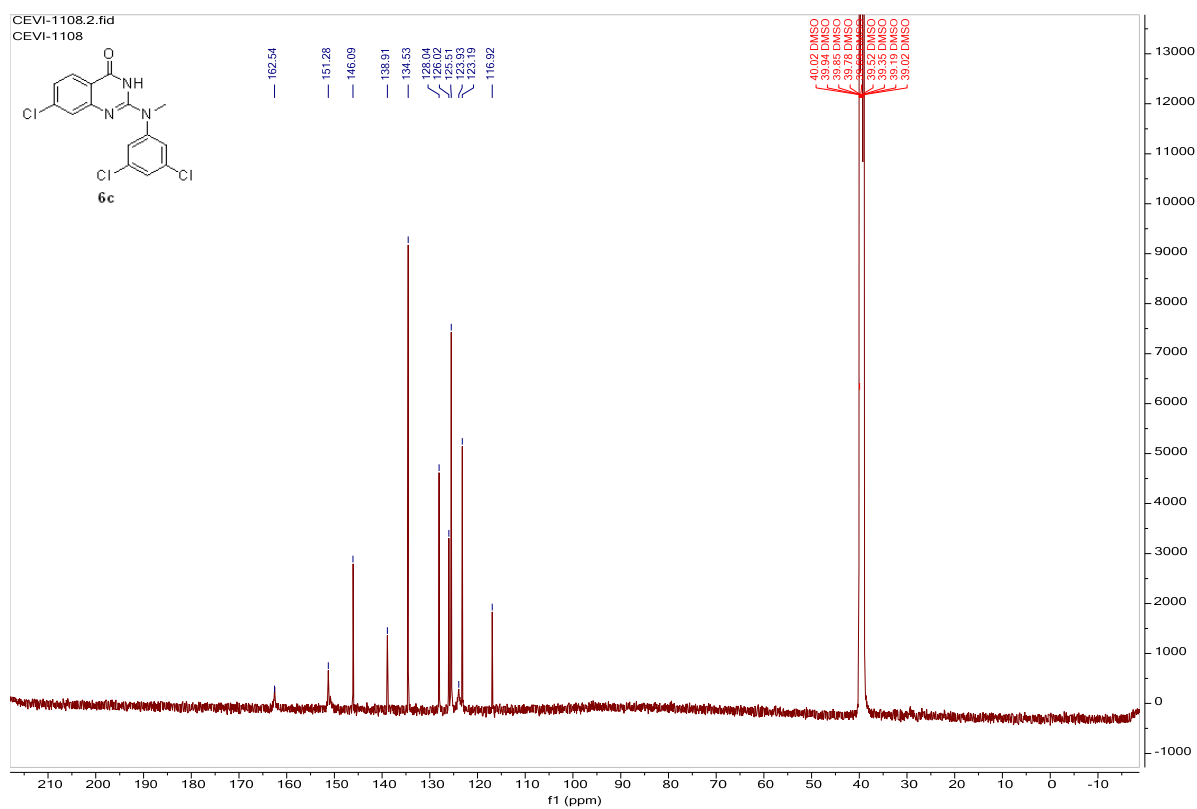

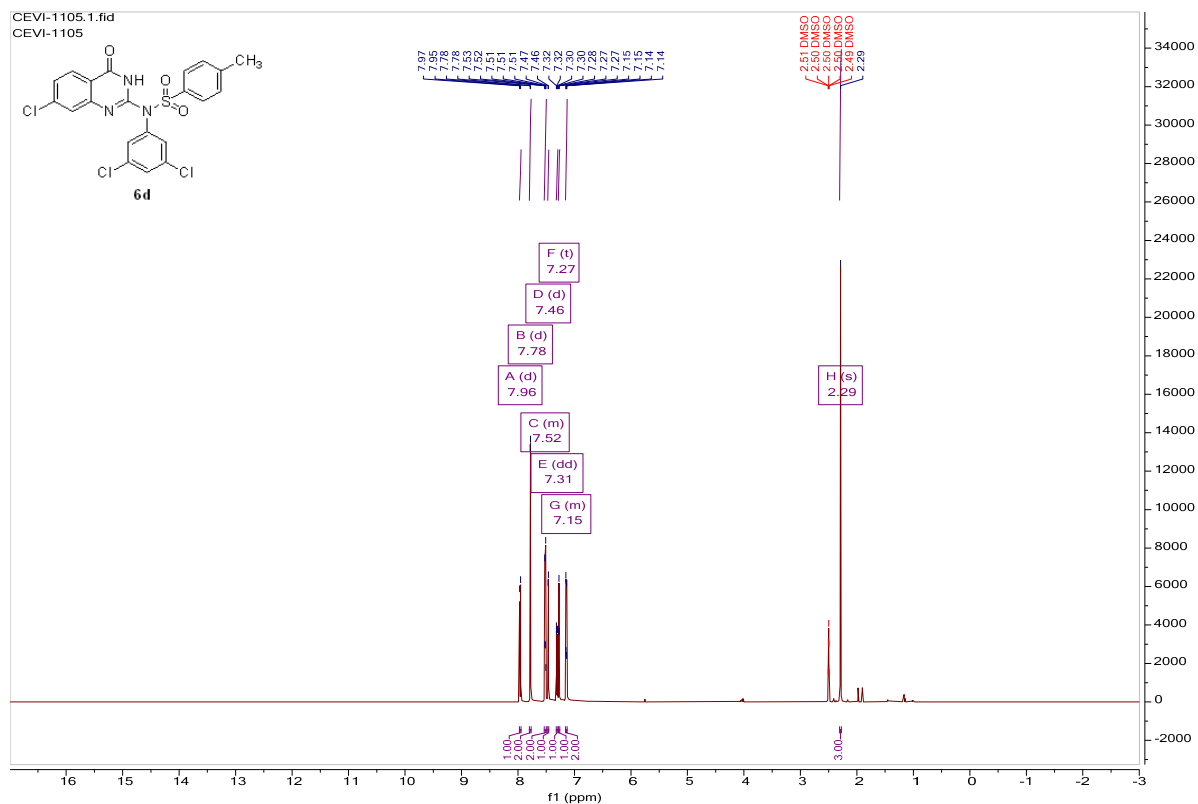

<sup>1</sup>H NMR spectrum (500 MHz, DMSO-*d*<sub>6</sub>) of **6d**

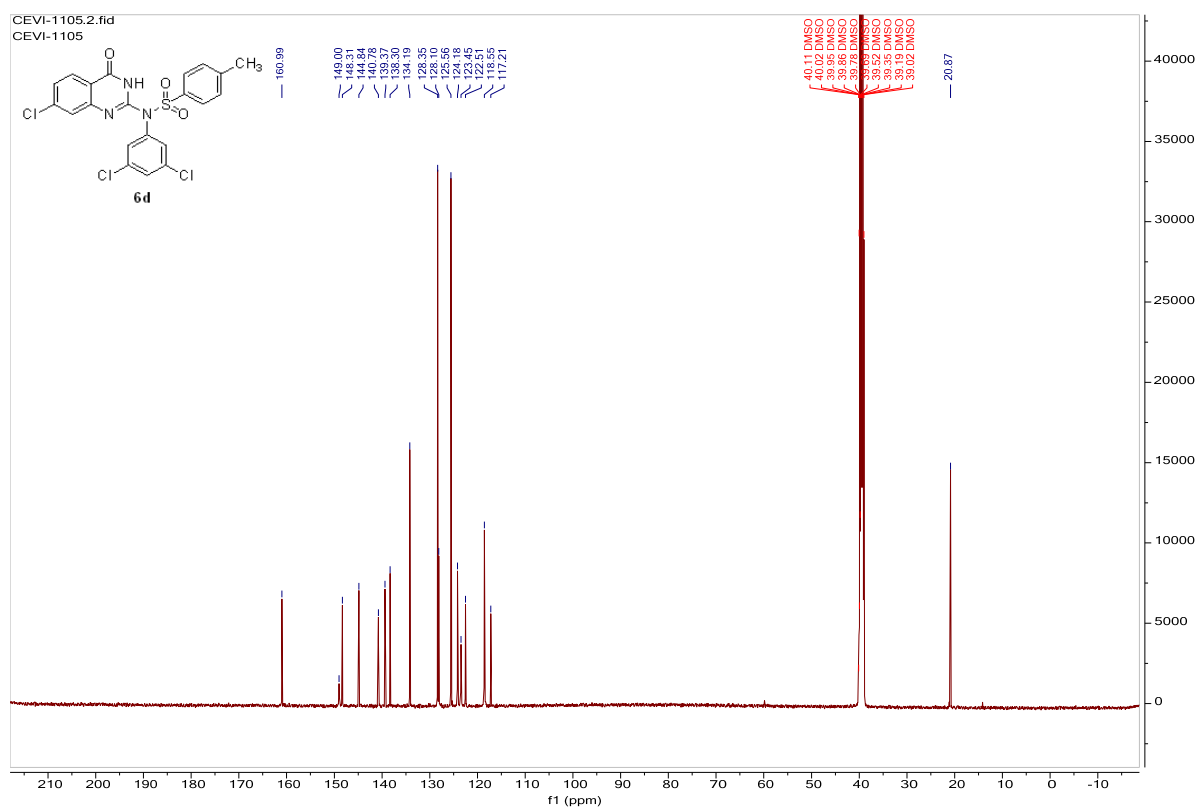

<sup>13</sup>C NMR spectrum (125 MHz, DMSO-*d*<sub>6</sub>) of **6d**

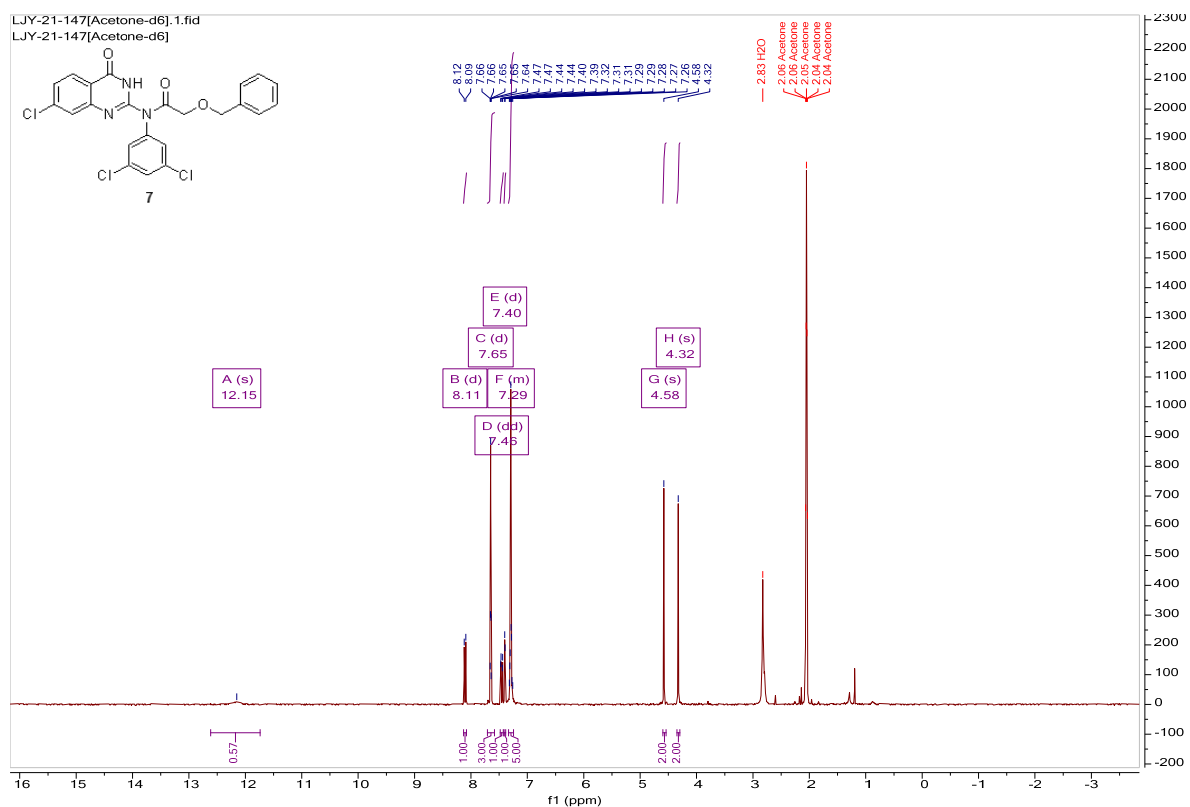

<sup>1</sup>H NMR spectrum (300 MHz, Acetone-*d*<sub>6</sub>) of 7

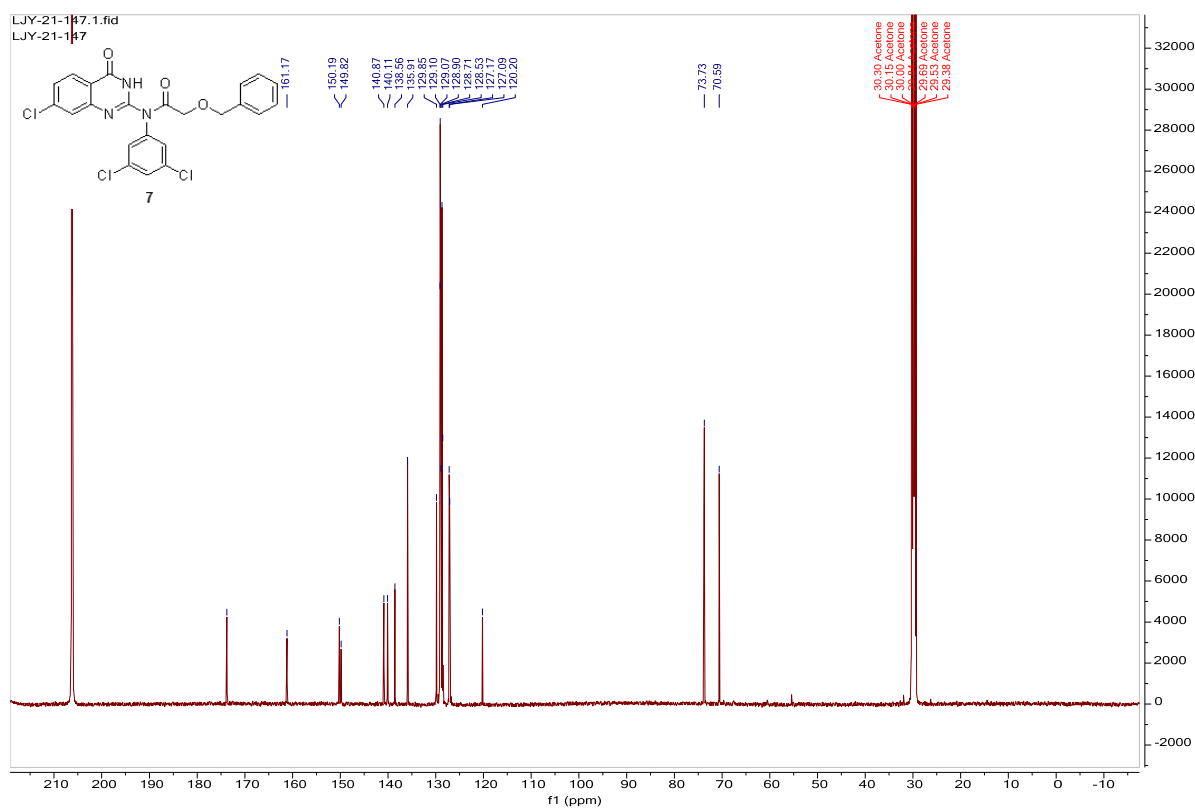

<sup>13</sup>C NMR spectrum (125 MHz, Acetone-*d*<sub>6</sub>) of 7



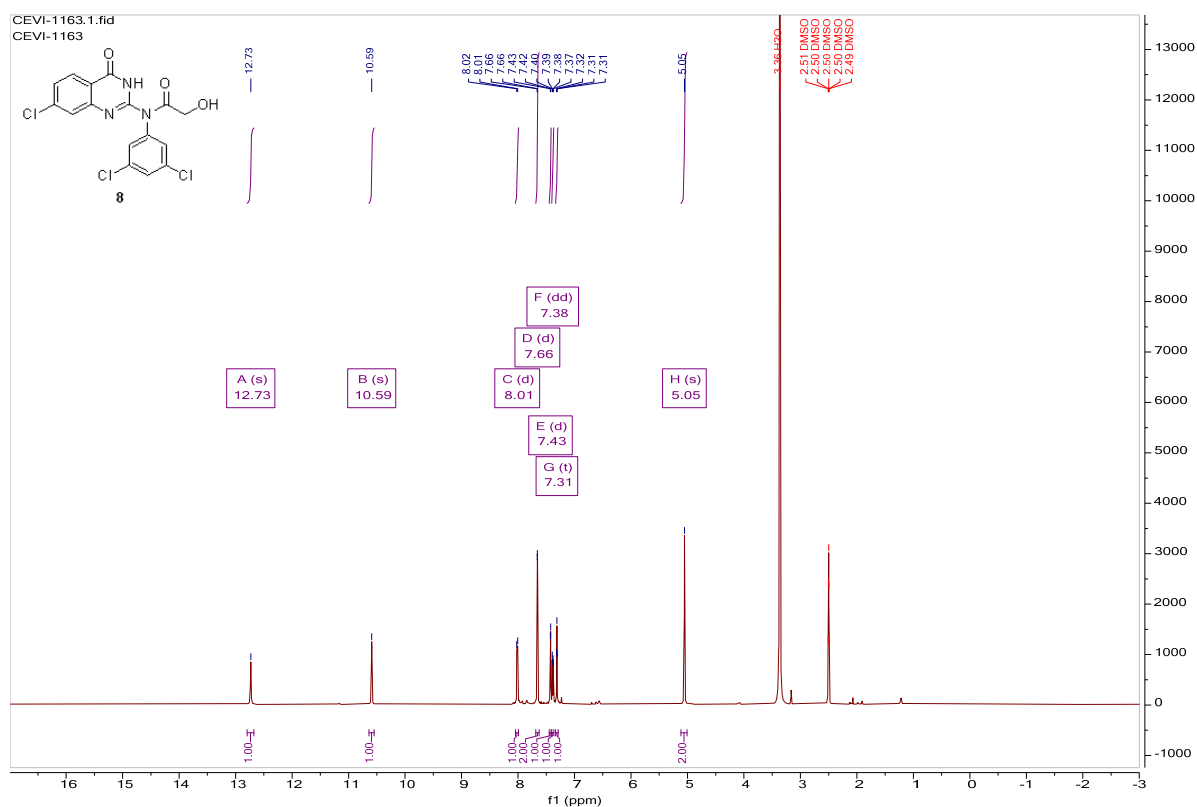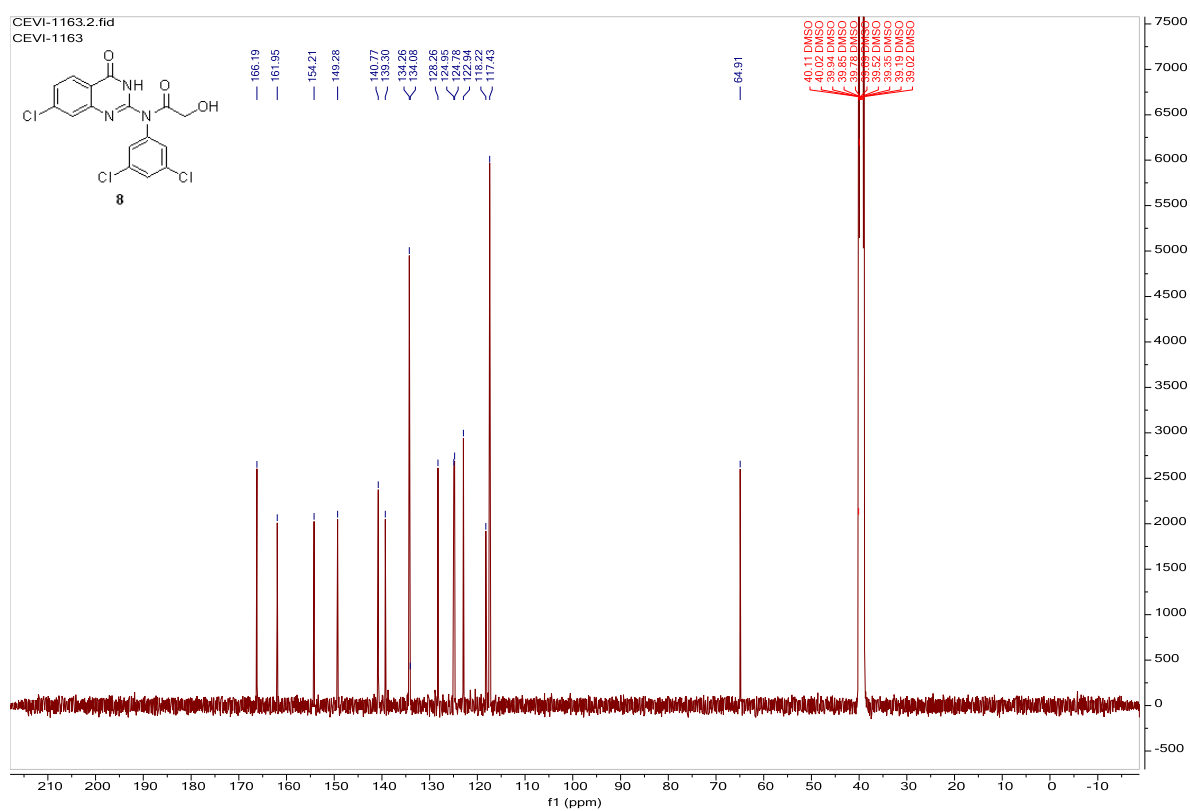

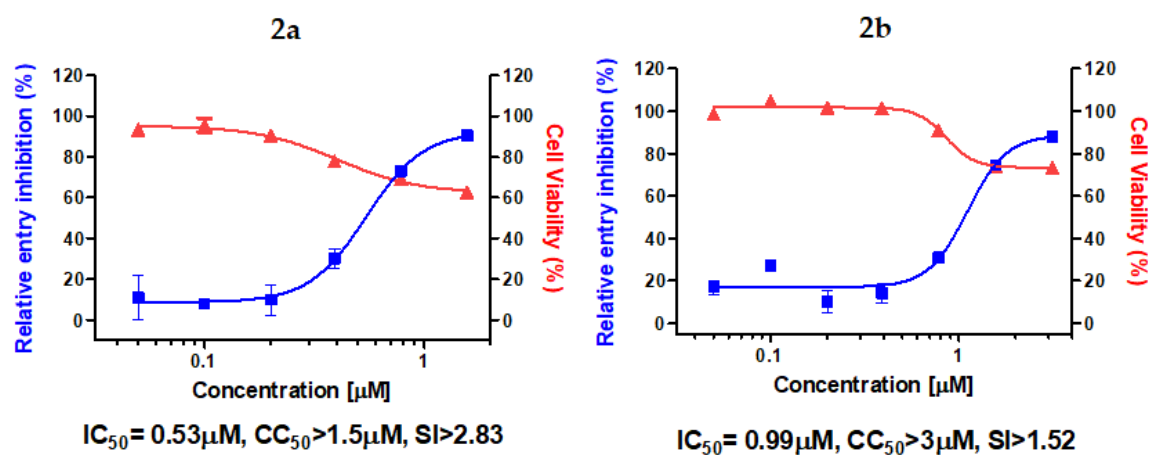

**Figure 1S.** Concentration-response inhibition curves of **2a** and **2b** against SARS-CoV-2 pseudovirus
